# Supplementary material for: A genome-wide association analysis reveals a potential role for recombination in the evolution of antimicrobial resistance in Burkholderia multivorans
Source: PLOS journal article supplement (doi:10.1371/journal.ppat.1007453), 2018-12-07

**A**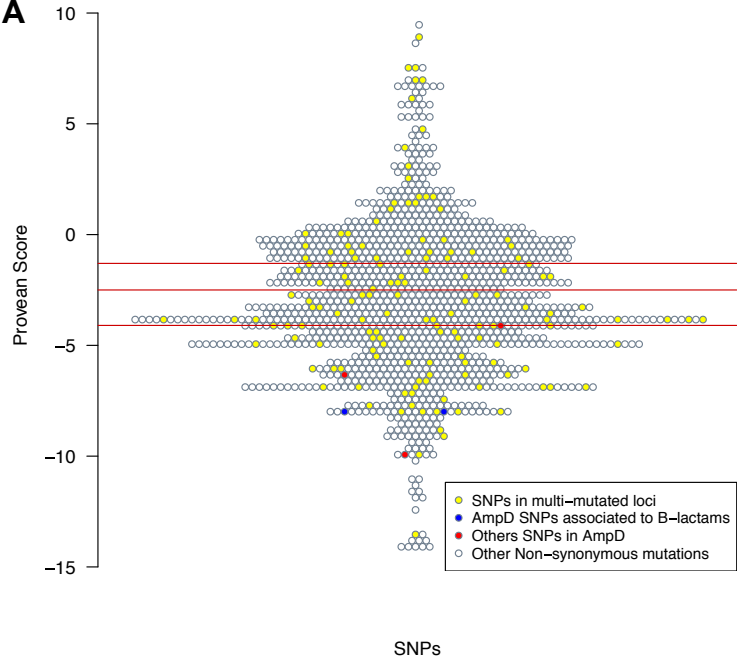**B**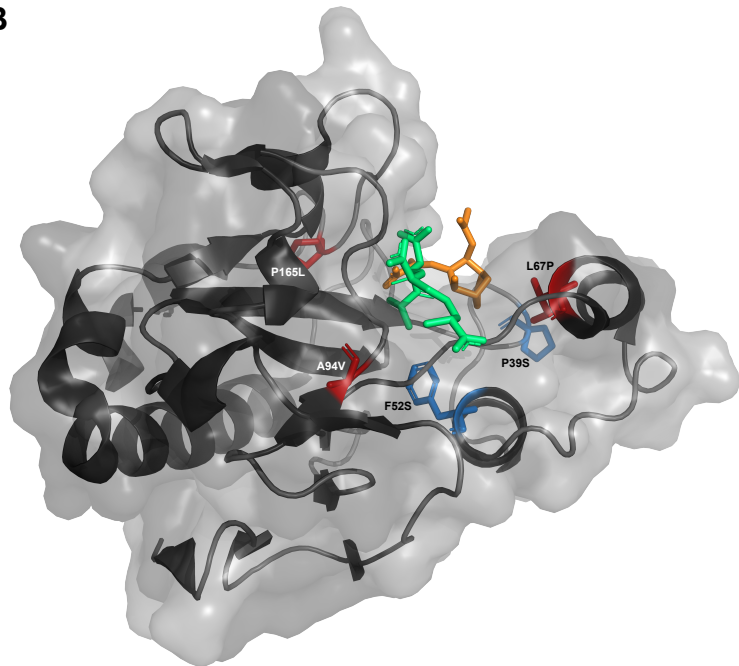

**B**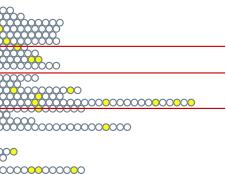

in multi-mutated loci  
o SNPs associated to B-lactams  
s SNPs in AmpD  
Non-synonymous mutations

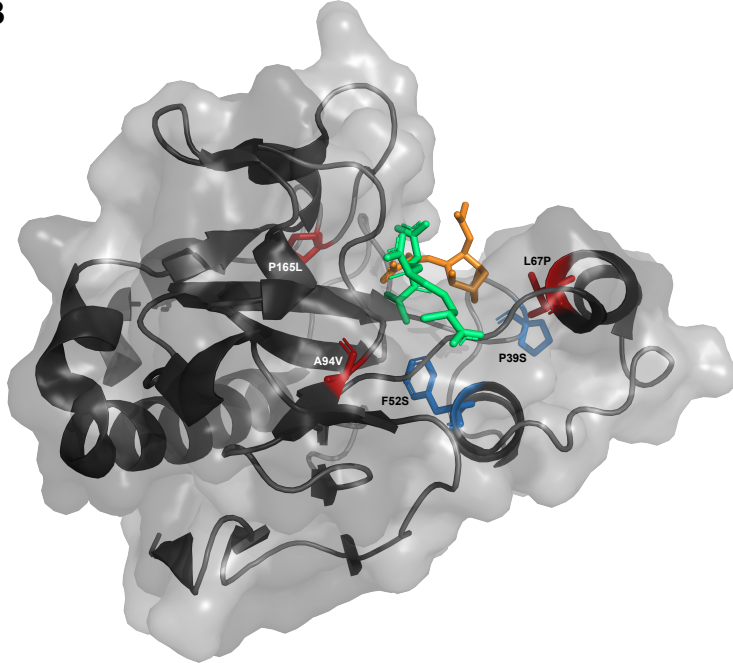

**A**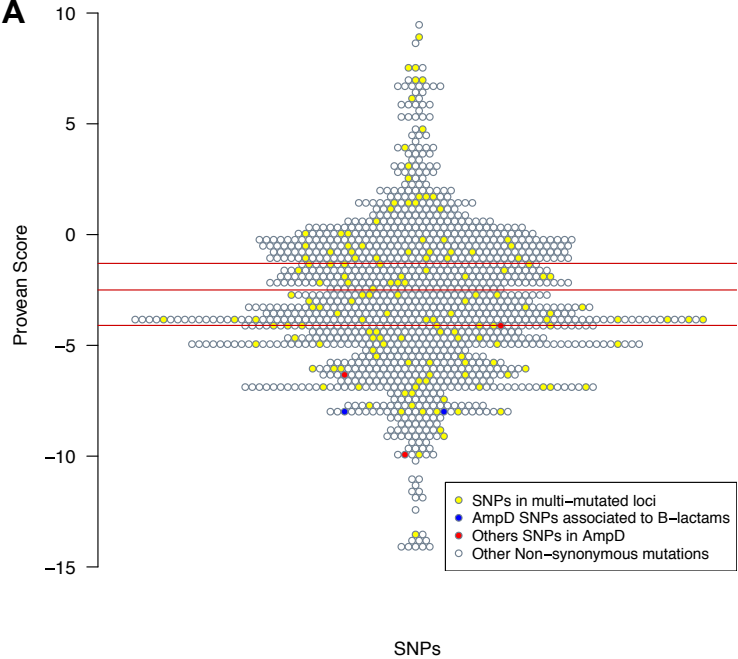**B**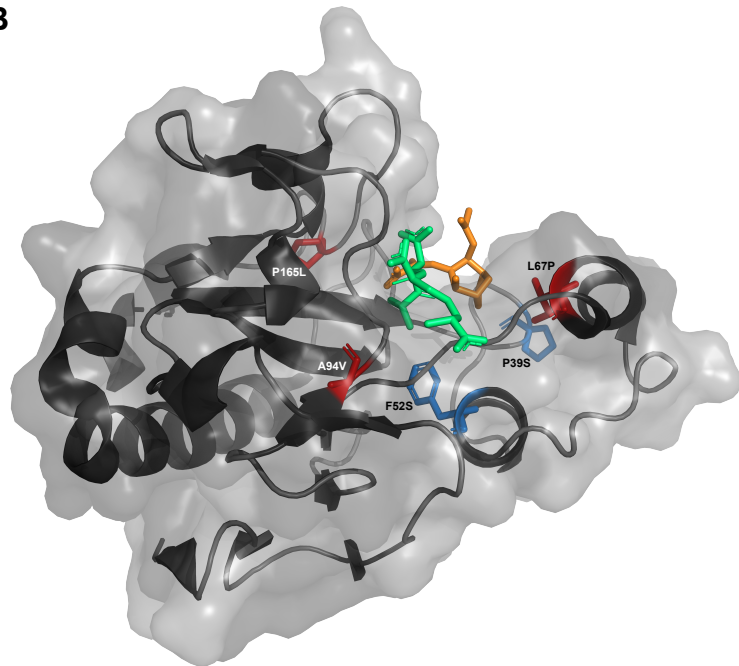

Supplement: S10 (10.1371/journal.ppat.1007453.s010) [file journal.ppat.1007453.s010]
